# Supplementary material for: Lactate induces the development of beige adipocytes via an increase in the level of reactive oxygen species
Source: Royal Society of Chemistry journal article supplement (doi:10.1039/d3fo03287f), 2023-01-01
Supplement: d3fo03287f1.pdf [file d3fo03287f1.pdf]

## Supporting Information

**Lactate induces the development of beige adipocytes  
via an increase in the level of reactive oxygen species.**

**Authors: Nana Esaki, Toshiro Matsui and Takanori Tsuda**

### 1. Supporting materials and methods

The antibodies and assay ID numbers of the TaqMan gene expression assays used in this study are shown in the tables below.

| List of antibodies |                                                       |             |
|--------------------|-------------------------------------------------------|-------------|
| Antibody           | Manufacturer                                          | Product No. |
| COXIV              | Cell Signaling Technology, Tokyo, Japan               | #4844       |
| GAPDH              | Fujifilm Wako Pure Chemical Corporation, Osaka, Japan | 016-25523   |
| LDHA               | Proteintech, Tokyo, Japan                             | 19987-1-AP  |
| LDHB               | Proteintech, Tokyo, Japan                             | 19988-1-AP  |
| MCT1               | Proteintech, Tokyo, Japan                             | 20139-1A-AP |
| PGC-1 $\alpha$     | Abcam, Tokyo, Japan                                   | ab54481     |
| UCP1               | Abcam, Tokyo, Japan                                   | ab209483    |

| List of ID numbers of TaqMan gene expression assays |               |
|-----------------------------------------------------|---------------|
| UCP1                                                | Mm01244861_m1 |
| Cidea                                               | Mm00432554_m1 |
| Elovl3                                              | Mm00468164_m1 |
| Cox8b                                               | Mm00432648_m1 |
| TBP                                                 | Mm00446971_m1 |

Cidea, cell death-inducing DNA fragmentation factor, alpha subunit-like effector A  
Elovl3, elongation of very long chain fatty acids-like 3  
Cox8b, cytochrome C oxidase subunit VIII b

*Immunoblot analysis.* The tissue samples were homogenized, centrifuged and the total protein concentrations of the obtained supernatant were determined using a Protein Assay System (Bio-Rad, Richmond, CA, USA) with bovine  $\gamma$ -globulin employed as a standard. Aliquots of the supernatant were treated with Laemmli sample buffer for 5 min at 100 °C. The samples were then loaded onto an SDS-PAGE system. The resulting gel was

transblotted onto a PVDF membrane, which was blocked with 5% skim milk for 1 h at room temperature. After a washing with 20 mM Tris-HCl-buffered saline containing 0.05% (w/v) Tween 20 (TTBS), the membrane sheets were reacted with various antibodies for 16 h at 4 °C. After a washing with TTBS, the membranes were reacted with horseradish peroxidase-conjugated anti-rabbit IgG secondary antibodies (1:2000 dilution; Cell Signaling Technology, Tokyo, Japan) for 1 h at room temperature. After a washing, immunoreactivity was visualized using the ECL reagent (Thermo Fisher Scientific, Yokohama, Japan), and the relative signal intensity was evaluated with iBright CL1500 Imaging System (Thermo Fisher Scientific).

## 2. Supporting Table.

**Table S1. Body weight, food intake, and relative tissue weights in the control and lactate groups.<sup>1</sup>**

|                                          | <b>Control</b>     | <b>Lactate</b>      |
|------------------------------------------|--------------------|---------------------|
| <b>Initial body weight, g</b>            | <b>18.7 ± 0.4</b>  | <b>18.6 ± 0.3</b>   |
| <b>Final body weight, g</b>              | <b>26.3 ± 0.6</b>  | <b>27.2 ± 0.5</b>   |
| <b>Food intake, g/(4 weeks · mouse)</b>  | <b>98.9 ± 1.7</b>  | <b>105.3 ± 1.9*</b> |
| <b>Water intake, g/(4 weeks · mouse)</b> | <b>94.1 ± 4.2</b>  | <b>111.2 ± 4.6*</b> |
| <b>iWAT, g/100 g body</b>                | <b>1.84 ± 0.07</b> | <b>1.91 ± 0.08</b>  |
| <b>eWAT, g/100 g body</b>                | <b>2.00 ± 0.13</b> | <b>2.16 ± 0.09</b>  |
| <b>Interscapular BAT, g/100 g body</b>   | <b>0.48 ± 0.03</b> | <b>0.53 ± 0.01</b>  |

<sup>1</sup> Values are presented as means ± SEM (*n* = 10).

\*, Significantly different from the control group (*p* < 0.05).

### 3. Supporting Fig.

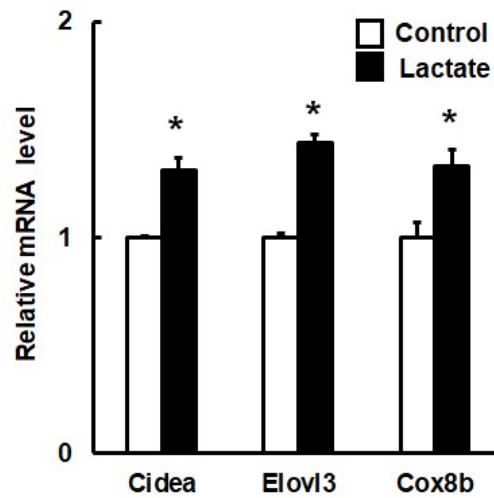

**Fig. S1.** mRNA levels of browning markers in C3H10T1/2 cells treated with vehicle (control) or 20 mM lactate for 16 h. The mRNA levels of each target genes are expressed as fold-change relative to the control (= 1) after normalization to the mRNA levels of TBP. Data are presented as means  $\pm$  SEM ( $n = 3$ ). \*Mean values are significantly different from those of the control group ( $p < 0.05$ ). Cidea, cell death-inducing DNA fragmentation factor, alpha subunit-like effector A; Elovl3, elongation of very long chain fatty acids-like 3; Cox8b, cytochrome C oxidase subunit VIII b.
